# Supplementary material for: Impact of biological aging on arterial aging in American Indians: findings from the Strong Heart Family Study
Source: PubMed Central journal article supplement (PMC5032684; doi:10.18632/aging.101013), 2016-08-11
Supplement: aging-08-1583-s001.pdf [file aging-08-1583-s001.pdf]

**SUPPLEMENTARY DATA**

**Supplementary Table S1.** Multivariate-adjusted association between LTL and log-transformed stiffness index  $\beta$  in American Indians after further adjusting for medication use

| Subgroups                 | No. of participants | Multivariate-adjusted* |                 | Additionally adjusted for hsCRP† |                 |
|---------------------------|---------------------|------------------------|-----------------|----------------------------------|-----------------|
|                           |                     | $\beta$ (SE)           | <i>P</i> -value | $\beta$ (SE)                     | <i>P</i> -value |
| All participants          | 2165                | -0.069 (0.026)         | 0.007           | -0.070 (0.025)                   | 0.005           |
| No CVD                    | 2062                | -0.067 (0.028)         | 0.015           | -0.066 (0.027)                   | 0.013           |
| No diabetes               | 1778                | -0.072 (0.028)         | 0.011           | -0.075 (0.029)                   | 0.009           |
| No chronic kidney disease | 2033                | -0.088 (0.028)         | 0.001           | -0.089 (0.027)                   | 0.001           |

LTL: leukocyte telomere length; hsCRP: high-sensitivity C-reactive protein.

\*Adjusting for sociodemographics (age, sex, education level), study site, metabolic factors (systolic blood pressure, fasting glucose, low- and high- density lipoprotein cholesterol, estimated glomerular filtration rate), lifestyle factors (body mass index, current smoking, current drinking, physical activity), prevalent CVD, and medication use (against hypertension, diabetes, hypercholesterolemia).

†Further adjusting for high-sensitivity C-reactive protein.
